# Supplementary material for: A Novel Prognostic Nomogram for Predicting Risks of Distant Failure in Patients with Invasive Breast Cancer Following Postoperative Adjuvant Radiotherapy
Source: PubMed Central journal article supplement — Cancer Res Treat. 2017 Dec 7;50(4):1140–8. doi: 10.4143/crt.2017.508 (PMC6192903; doi:10.4143/crt.2017.508), 2017-12-07
Supplement: crt-2017-508-suppl2.pdf [file crt-2017-508-suppl2.pdf]

**S2 Table.** Subgroup analysis of overall survival in patients with distant metastasis as the initial failure

| Variable                              | No.<br>(n=81) | 5-Year rate<br>(%) | p-value |
|---------------------------------------|---------------|--------------------|---------|
| Age (yr)                              |               |                    |         |
| < 45                                  | 43            | 56.1               | 0.299   |
| ≥ 45                                  | 38            | 65.6               |         |
| Molecular subtypes                    |               |                    |         |
| Luminal                               | 41            | 84.6               | < 0.001 |
| HER2                                  | 15            | 60.0               |         |
| Triple negative                       | 25            | 23.3               |         |
| AJCC stage                            |               |                    |         |
| I                                     | 8             | 50.0               | 0.622   |
| II                                    | 17            | 64.7               |         |
| III                                   | 56            | 61.1               |         |
| Histologic grade <sup>a)</sup>        |               |                    |         |
| I-II                                  | 42            | 75.8               | 0.005   |
| III                                   | 33            | 43.2               |         |
| Lymphovascular invasion <sup>a)</sup> |               |                    |         |
| No                                    | 23            | 55.1               | 0.893   |
| Yes                                   | 49            | 62.5               |         |
| Primary surgery                       |               |                    |         |
| Breast-conserving                     | 32            | 56.3               | 0.210   |
| Mastectomy                            | 49            | 63.8               |         |
| Lymph node surgery                    |               |                    |         |
| No ALND                               | 12            | 58.3               | 0.760   |
| ALND                                  | 69            | 61.4               |         |

HER2, human epidermal growth factor receptor 2; AJCC, American Joint Committee on Cancer; ALND, axillary lymph node dissection. <sup>a)</sup>Missing values were excluded.
