# Supplementary material for: A Novel Prognostic Nomogram for Predicting Risks of Distant Failure in Patients with Invasive Breast Cancer Following Postoperative Adjuvant Radiotherapy
Source: PubMed Central journal article supplement — Cancer Res Treat. 2017 Dec 7;50(4):1140–8. doi: 10.4143/crt.2017.508 (PMC6192903; doi:10.4143/crt.2017.508), 2017-12-07
Supplement: crt-2017-508-suppl3.pdf [file crt-2017-508-suppl3.pdf]

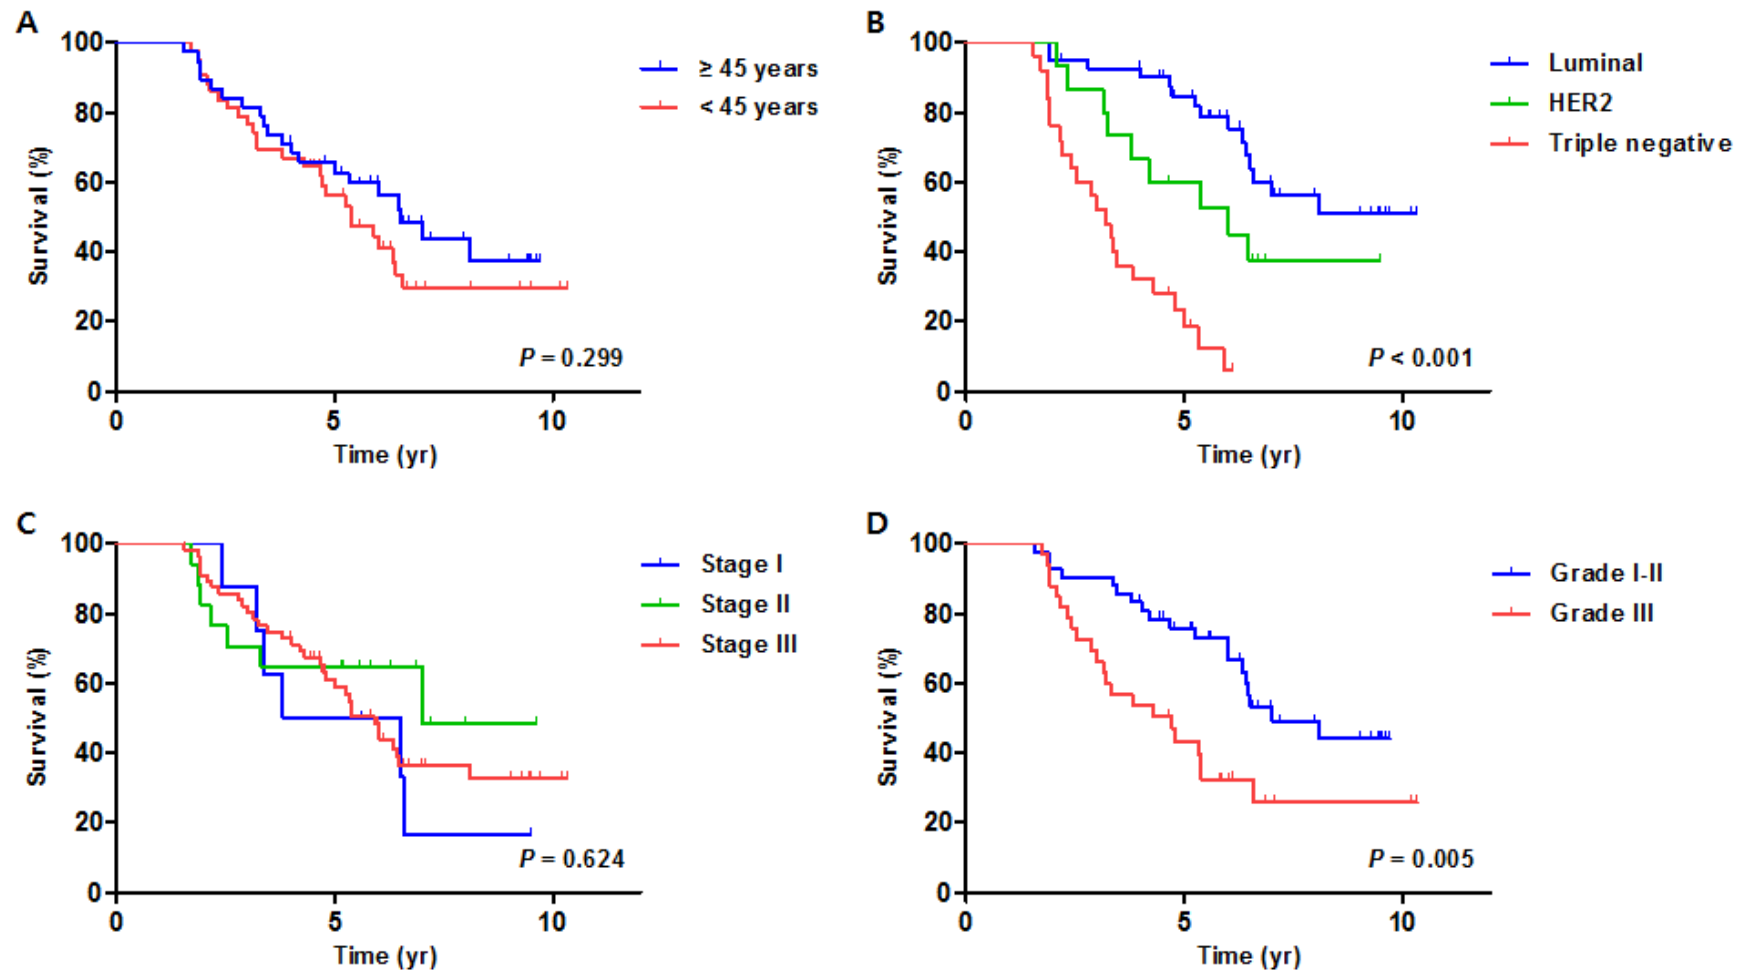

**S3 Fig.** Overall survival differences according to age (A), molecular subtypes (B), American Joint Committee on Cancer stages (C), and histologic grade (D) in patients diagnosed with distant metastasis. HER2, human epidermal growth factor receptor 2.
