# Supplementary material for: A Novel Prognostic Nomogram for Predicting Risks of Distant Failure in Patients with Invasive Breast Cancer Following Postoperative Adjuvant Radiotherapy
Source: PubMed Central journal article supplement — Cancer Res Treat. 2017 Dec 7;50(4):1140–8. doi: 10.4143/crt.2017.508 (PMC6192903; doi:10.4143/crt.2017.508), 2017-12-07
Supplement: crt-2017-508-suppl4.pdf [file crt-2017-508-suppl4.pdf]

**S4 Table.** Clinicopathologic characteristics according to chemotherapy methods

| Variable                              | Adjuvant<br>(n=664) | Neoadjuvant<br>(n=152) | Both<br>(n=112) | p-value <sup>a)</sup> |
|---------------------------------------|---------------------|------------------------|-----------------|-----------------------|
| Age (yr)                              |                     |                        |                 |                       |
| < 45                                  | 212 (32)            | 61 (40)                | 42 (38)         | 0.103                 |
| ≥ 45                                  | 452 (68)            | 91 (60)                | 70 (62)         |                       |
| T category                            |                     |                        |                 |                       |
| T1                                    | 385 (58)            | 4 (3)                  | 6 (5)           | < 0.001               |
| T2                                    | 260 (39)            | 75 (49)                | 63 (56)         |                       |
| T3                                    | 19 (3)              | 53 (35)                | 30 (27)         |                       |
| T4                                    | 0 (0)               | 20 (13)                | 13 (12)         |                       |
| N stage                               |                     |                        |                 |                       |
| N0                                    | 387 (58)            | 19 (12)                | 5 (4)           | < 0.001               |
| N1                                    | 171 (26)            | 57 (38)                | 50 (45)         |                       |
| N2                                    | 76 (11)             | 46 (30)                | 34 (30)         |                       |
| N3                                    | 30 (5)              | 30 (20)                | 23 (21)         |                       |
| Histologic grade <sup>b)</sup>        |                     |                        |                 |                       |
| I                                     | 83 (13)             | 17 (16)                | 5 (6)           | 0.076                 |
| II-III                                | 539 (87)            | 92 (84)                | 85 (94)         |                       |
| Lymphovascular invasion <sup>b)</sup> |                     |                        |                 |                       |
| No                                    | 343 (56)            | 58 (51)                | 26 (29)         | < 0.001               |
| Yes                                   | 269 (44)            | 56 (49)                | 62 (71)         |                       |

<sup>a)</sup>Pearson's chi-square test, <sup>b)</sup>Missing values were excluded.
